# Supplementary material
Source: publisher figshare collection journal article supplement (https://osapublishing.figshare.com/ndownloader/files/17017442)
Supplement: Supplementary file 1 [file 17017442]

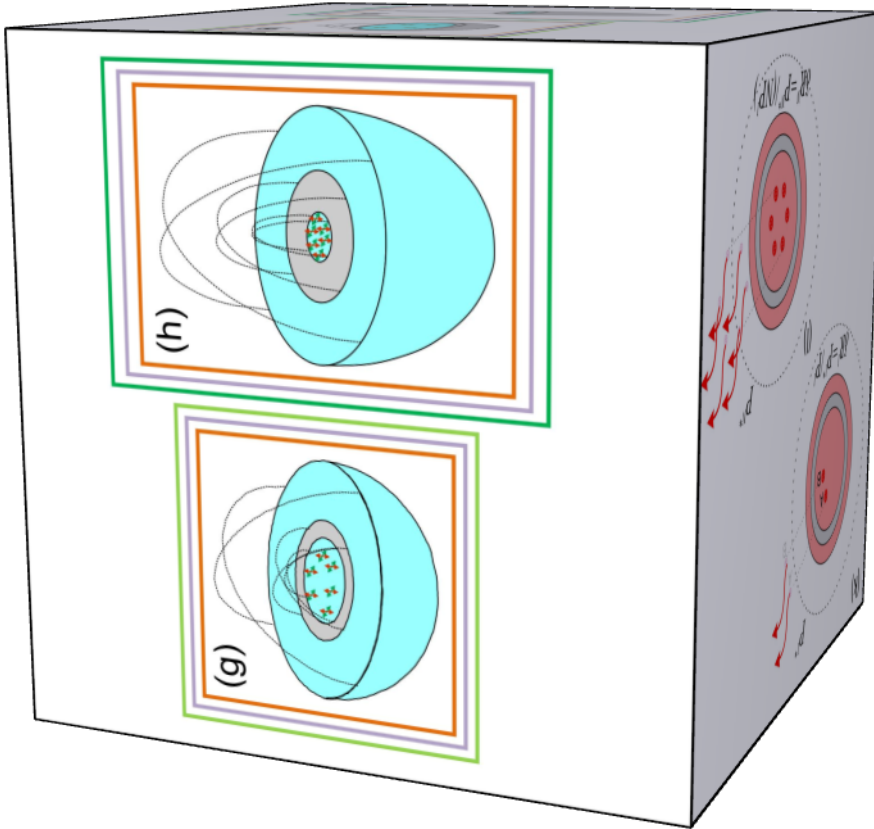

**Visualization 4.** Ratios of different quantities with respect to those in corresponding reference systems. (a)  $r\delta R$  ratio of radiative rate enhancements at excitation and emission, (b)  $rcQE$  ratio of the corrected quantum efficiencies at emission wavelength, (c)  $rP_x$  total fluorescence enhancement ratio and  $rP_{xcQE}$  objective function ratio. Lines are to guide eyes and to uncover tendencies of depicted quantities in groups of (a, b, c) spherical and ellipsoidal nanoresonators, among them (a) excitation and emission phenomena, and at both wavelengths 4 and 6 color centers separately, (c)  $rP_x$  factor and  $rP_{xcQE}$  and for both ratios 4 and 6 color centers separately.

Colors indicate, when certain quantity is larger in case of

4                      6                      number of emitters  
                                            type of nanoresonator  
coated                      bare  
                                            geometry of nanoresonator  
spherical                      ellipsoidal  
                      

| ratio                  | bare_4    |             | coated_4  |             | bare_6    |             | coated_6  |             |
|------------------------|-----------|-------------|-----------|-------------|-----------|-------------|-----------|-------------|
|                        | spherical | ellipsoidal | spherical | ellipsoidal | spherical | ellipsoidal | spherical | ellipsoidal |
| $rcQE_{em}$            |           |             |           |             |           |             |           |             |
|                        | 1.00      | 1.03        | 1.00      | 1.05        | 1.01      | 1.04        | 1.00      | 1.02        |
| $r\delta R_{ex}$       |           |             |           |             |           |             |           |             |
|                        | 4.00      | 4.00        | 3.98      | 4.00        | 5.99      | 6.00        | 5.98      | 6.01        |
| $P_{ex}^N/P_{ex}^{1*}$ |           |             |           |             |           |             |           |             |
|                        | 16.000    | 15.995      | 15.920    | 15.999      | 35.940    | 36.022      | 35.880    | 36.036      |
| $r\delta R_{em}$       |           |             |           |             |           |             |           |             |
|                        | 4.02      | 4.13        | 4.01      | 4.17        | 6.03      | 6.21        | 6.01      | 6.13        |
| $P_{em}^N/P_{em}^{1*}$ |           |             |           |             |           |             |           |             |
|                        | 16.080    | 16.506      | 16.040    | 16.673      | 36.180    | 37.271      | 36.060    | 36.774      |
| $rP_x$                 |           |             |           |             |           |             |           |             |
|                        | 16.07     | 16.50       | 15.97     | 16.67       | 36.13     | 37.29       | 35.95     | 36.81       |
| $rP_x cQE$             |           |             |           |             |           |             |           |             |
|                        | 16.15     | 17.04       | 15.96     | 17.42       | 36.33     | 38.71       | 36.04     | 37.71       |

**Table corresponding to Visualization 4.** Ratios of different quantities in a coupled system consisting of  $N$  collectively oscillating SiV color centers and a corresponding reference system consisting of one single SiV color center, which prove the switching into superradiantly enhanced collective states in optimized nanoresonators.  $N$ : number of color centers,  $rcQE_{em} = cQE_{em}^N / cQE_{em}^1$ : ratio of corrected quantum efficiencies at emission,  $r\delta R_{ex} = \delta R_{ex}^N / \delta R_{ex}^1$ : ratio of excitation rate enhancements,  $P_{ex}^N / P_{ex}^{1*}$ : ratio of enhanced powers radiated by a coupled superradiant and a reference system at the excitation wavelength,  $r\delta R_{em} = \delta R_{em}^N / \delta R_{em}^1$ : ratio of emission rate enhancements,  $P_{em}^N / P_{em}^{1*}$ : ratio of enhanced powers radiated by a coupled superradiant and a reference system at the emission wavelength,  $rP_x = P_x^N / P_x^1$ : ratio of  $P_x$  factors,  $rP_x cQE = P_x cQE^N / P_x cQE^1$ : ratio of objective functions.
